# Supplementary material
Source: PubMed Central journal article supplement (PMC11558431)
Supplement: ajtr0016-5564-f5.pdf [file ajtr0016-5564-f5.pdf]

## Prediction of pediatric malnutrition risk

**Supplementary Table 1.** Univariate and multivariate logistic regression analysis of variables predicting PEM in training set

| Variables                      | Univariate analysis |          |                     | Multivariate analysis |          |                      |
|--------------------------------|---------------------|----------|---------------------|-----------------------|----------|----------------------|
|                                | $\beta$             | <i>P</i> | OR (95% CI)         | $\beta$               | <i>P</i> | OR (95% CI)          |
| <b>Age</b>                     |                     |          |                     |                       |          |                      |
| 8 years                        |                     |          | Reference           |                       |          |                      |
| 9 years                        | 0.082               | 0.628    | 1.086 (0.778-1.516) |                       |          |                      |
| 10 years                       | 0.111               | 0.501    | 1.117 (0.809-1.544) |                       |          |                      |
| <b>Sex</b>                     |                     |          |                     |                       |          |                      |
| Male                           |                     |          | Reference           |                       |          |                      |
| Female                         | -0.046              | 0.732    | 0.955 (0.732-1.245) |                       |          |                      |
| <b>Gestational Age</b>         |                     |          |                     |                       |          |                      |
| $\geq 37$ weeks                |                     |          | Reference           |                       |          | Reference            |
| <37 weeks                      | 1.751               | <0.001   | 5.762 (3.733-8.894) | 1.763                 | <0.001   | 5.830 (3.604-9.431)  |
| <b>Birth Weight</b>            |                     |          |                     |                       |          |                      |
| $\geq 2.5$ kg                  |                     |          | Reference           |                       |          |                      |
| <2.5 kg                        | 0.167               | 0.293    | 1.182 (0.866-1.615) |                       |          |                      |
| <b>Residence</b>               |                     |          |                     |                       |          |                      |
| Rural                          |                     |          | Reference           |                       |          |                      |
| Urban                          | -0.081              | 0.548    | 0.922 (0.707-1.202) |                       |          |                      |
| <b>Left Behind Children</b>    |                     |          |                     |                       |          |                      |
| No                             |                     |          | Reference           |                       |          |                      |
| Yes                            | 0.081               | 0.584    | 1.084 (0.811-1.449) |                       |          |                      |
| <b>Household income</b>        |                     |          |                     |                       |          |                      |
| <100 thousand yuan             |                     |          | Reference           |                       |          | Reference            |
| $\geq 100$ thousand yuan       | -1.023              | <0.001   | 0.359 (0.273-0.472) | -0.959                | <0.001   | 0.383 (0.281-0.523)  |
| <b>Number of children</b>      |                     |          |                     |                       |          |                      |
| >1                             |                     |          | Reference           |                       |          |                      |
| 1                              | -0.088              | 0.518    | 0.916 (0.703-1.194) |                       |          |                      |
| <b>Sleep Duration</b>          |                     |          |                     |                       |          |                      |
| $\geq 9$ hours                 |                     |          | Reference           |                       |          | Reference            |
| <9 hours                       | 0.538               | <0.001   | 1.712 (1.310-2.237) | 0.588                 | 0.005    | 1.800 (1.319-2.457)  |
| <b>Parents education level</b> |                     |          |                     |                       |          |                      |
| low level                      |                     |          | Reference           |                       |          |                      |
| high level                     | -0.182              | 0.181    | 0.834 (0.639-1.088) |                       |          |                      |
| <b>Bad eating habits</b>       |                     |          |                     |                       |          |                      |
| No                             |                     |          | Reference           |                       |          |                      |
| Yes                            | 0.302               | 0.030    | 1.352 (1.030-1.775) |                       |          |                      |
| <b>Calcium Deficiency</b>      |                     |          |                     |                       |          |                      |
| No                             |                     |          | Reference           |                       |          |                      |
| Yes                            | 0.172               | 0.049    | 1.187 (0.829-0.947) |                       |          |                      |
| <b>Iron Deficiency</b>         |                     |          |                     |                       |          |                      |
| No                             |                     |          | Reference           |                       |          |                      |
| Yes                            | 0.182               | 0.335    | 1.200 (0.828-1.738) |                       |          |                      |
| <b>Zinc Deficiency</b>         |                     |          |                     |                       |          |                      |
| No                             |                     |          | Reference           |                       |          |                      |
| Yes                            | 0.063               | 0.820    | 1.065 (0.617-1.839) |                       |          |                      |
| <b>Mood disorders</b>          |                     |          |                     |                       |          |                      |
| No                             |                     |          | Reference           |                       |          | Reference            |
| Yes                            | 1.847               | <0.001   | 6.339 (4.236-9.484) | 1.935                 | <0.001   | 6.924 (4.437-10.805) |
| <b>Milk Intake</b>             |                     |          |                     |                       |          |                      |
| <300 ml/d                      |                     |          | Reference           |                       |          |                      |
| $\geq 300$ ml/d                | -0.352              | 0.015    | 0.704 (0.530-0.935) |                       |          |                      |

## Prediction of pediatric malnutrition risk

### Physical activity time

|            |       |        |                     |       |        |                     |
|------------|-------|--------|---------------------|-------|--------|---------------------|
| ≥2 hours/d |       |        | Reference           |       |        | Reference           |
| <2 hours/d | 1.153 | <0.001 | 3.167 (2.398-4.184) | 1.166 | <0.001 | 3.210 (2.342-4.400) |

Notes: Parents education levels: high level, have completed nine years of compulsory education; low level, have not completed nine years of compulsory education.
